# Supplementary material for: Hg2(SeO3)(TeO3): a novel tellurite–selenite birefringent crystal achieved by assembling multiple functional groups
Source: Royal Society of Chemistry journal article supplement (doi:10.1039/d4tc05126b), 2025-01-01
Supplement: d4tc05126b1.pdf [file d4tc05126b1.pdf]

## **Hg<sub>2</sub>(SeO<sub>3</sub>)(TeO<sub>3</sub>): A novel tellurite-selenite birefringent crystal achieved by assembling multiple functional groups**

Peng-Fei Li,<sup>a,b,c</sup> Chun-Li Hu,<sup>a,c</sup> Jiang-Gao Mao<sup>a,c</sup> and Fang Kong<sup>\*,a,b,c</sup>

<sup>a</sup> State Key Laboratory of Structural Chemistry, Fujian Institute of Research on the Structure of Matter, Chinese Academy of Sciences, Fuzhou 350002, P. R. China.

<sup>b</sup> College of Chemistry, Fuzhou University, Fuzhou 350108, P. R. China.

<sup>c</sup> University of Chinese Academy of Sciences, Beijing 100049, P. R. China.

E-mail: kongfang@fjirsm.ac.cn

### **Supporting Information**

|                                                                                                                                                                       |    |
|-----------------------------------------------------------------------------------------------------------------------------------------------------------------------|----|
| S1. Experimental Section .....                                                                                                                                        | 2  |
| S2. Computational Method .....                                                                                                                                        | 5  |
| Table S1. Summary of crystal data and structural refinements for Hg <sub>2</sub> (SeO <sub>3</sub> )(TeO <sub>3</sub> )...                                            | 7  |
| Table S2. Calculated bond valences for Hg <sub>2</sub> (SeO <sub>3</sub> )(TeO <sub>3</sub> ).....                                                                    | 8  |
| Table S3. State energies (eV) of the lowest conduction band (L-CB) and the highest valence band (H-VB) of Hg <sub>2</sub> (SeO <sub>3</sub> )(TeO <sub>3</sub> )..... | 9  |
| Figure S1. Simulated and experimental powder X-ray diffractometer patterns of Hg <sub>2</sub> (SeO <sub>3</sub> )(TeO <sub>3</sub> ).....                             | 10 |
| Figure S2. TGA and DTA results of Hg <sub>2</sub> (SeO <sub>3</sub> )(TeO <sub>3</sub> ).....                                                                         | 11 |
| Figure S3. IR spectra of Hg <sub>2</sub> (SeO <sub>3</sub> )(TeO <sub>3</sub> ). .....                                                                                | 12 |
| Figure S4. UV–vis–NIR diffuse-reflectance spectra of Hg <sub>2</sub> (SeO <sub>3</sub> )(TeO <sub>3</sub> ). .....                                                    | 13 |
| Figure S5. Band structures of Hg <sub>2</sub> (SeO <sub>3</sub> )(TeO <sub>3</sub> ).....                                                                             | 14 |
| Figure S6. Arrangement of SeO <sub>3</sub> and TeO <sub>3</sub> groups in the structure of Hg <sub>2</sub> (SeO <sub>3</sub> )(TeO <sub>3</sub> ).....                | 15 |
| References .....                                                                                                                                                      | 16 |

## **S1. Experimental Section**

### **Reagents and Instruments**

SeO<sub>2</sub> (Adamas-beta, 99.99%), TeO<sub>2</sub> (Adamas-beta, 99.99%) and HgO (J&K Scientific, 99.9%) were obtained from commercial sources and used without further purification.

**Powder X-ray** diffraction (PXRD) patterns of Hg<sub>2</sub>(SeO<sub>3</sub>)(TeO<sub>3</sub>) was collected on the Miniflex 600 powder X-ray diffractometer using Cu K $\alpha$  radiation ( $\lambda = 1.54186 \text{ \AA}$ ) at room temperature in the angular range of  $2\theta = 10\text{-}70^\circ$  with a scan step size of  $0.02^\circ$ .

**Microprobe elemental analyses** was carried out with the aid of a field-emission scanning electron microscope (FESEM, JSM6700F) equipped with an energy-dispersive X-ray spectroscope (EDS, Oxford INCA).

**IR spectra** was carried out on a Magna 750 FT-IR spectrometer using air as background in the range of  $4000\text{-}400 \text{ cm}^{-1}$  with a resolution of  $2 \text{ cm}^{-1}$  at room temperature.

**The UV-vis-NIR spectra** was obtained at  $2000\text{-}200 \text{ nm}$  by a PerkinElmer Lambda 900 spectrophotometer using BaSO<sub>4</sub> as the reference, and the reflection spectra was converted into an absorption spectrum using the Kubelka-Munk function. Absorption data was calculated from the diffuse reflection data by the Kubelka-Munk function:  $\alpha/S = (1-R)^2/2R$ , where  $\alpha$  and S represent the absorption coefficient and the scattering coefficient, respectively. The band gap value can be given by extrapolating the absorption edge to the baseline in the  $\alpha/S$  vs. energy graph[1].

**Thermogravimetric analyses** (TGA) were measured by Netzsch STA 499C installation. The samples about 3.0-5.0 mg were placed in alumina crucibles and heated in 20-1000 °C at a rate of 15 K/min under N<sub>2</sub> atmosphere.

### **Single-crystal X-ray diffraction**

Single crystal X-ray diffraction data of Hg<sub>2</sub>(SeO<sub>3</sub>)(TeO<sub>3</sub>) was obtained on Agilent Technologies SuperNova dual-wavelength CCD diffractometer with a graphite-monochromated Mo K $\alpha$  radiation ( $\lambda = 0.71073 \text{ \AA}$ ) at room temperature. Data reduction and cell refinement and were performed with *CrysAlisPro*. The structure was solved by the direct methods and refined by full-matrix least-squares fitting on  $F^2$  using *Olex2-1.5* crystallographic software package[2, 3]. All of the atoms were refined with anisotropic thermal parameters and finally converged for  $F_0^2 \geq 2\sigma(F_0^2)$ . The structural data was also checked for possible missing symmetry with the program *PLATON*, and no higher symmetry was found[4, 5]. The detailed crystallographic data for Hg<sub>2</sub>(SeO<sub>3</sub>)(TeO<sub>3</sub>) was given in Table S1. The bond lengths were listed in Table S2.

### **Syntheses**

Single crystals of Hg<sub>2</sub>(SeO<sub>3</sub>)(TeO<sub>3</sub>) were successfully obtained by high-temperature hydrothermal reaction. A mixture of SeO<sub>2</sub> (111.1 mg, 1 mmol), TeO<sub>2</sub> (159.6 mg, 1 mmol) and HgO (325 mg, 1.5 mmol) was sealed in an autoclave containing PPL liner equipped (23 ml), heated at 270 °C for 5760 minutes, and then slowly cooled to room temperature in 4320 minutes. The products were separated by vacuum filtration, washed with alcohol and dried in air at room temperature. The transparent Hg<sub>2</sub>(SeO<sub>3</sub>)(TeO<sub>3</sub>) crystal was obtained. Its purity has been verified through X-ray diffraction (XRD) studies (Figure S1). (*Note: PPL lining is renowned*

*for its high-temperature resistance and strong corrosion resistance, maintaining its integrity and sealing even under conditions of 280 °C.)*

## S2. Computational Method

Single-crystal structural data of  $\text{Hg}_2(\text{SeO}_3)(\text{TeO}_3)$  was used for the theoretical calculations. The electronic structures were performed using a plane-wave basis set and pseudo-potentials within density functional theory (DFT) implemented in the total-energy code CASTEP[6]. For the exchange and correlation functional, we chose Perdew–Burke–Ernzerhof (PBE) in the generalized gradient approximation (GGA)[7]. The interactions between the ionic cores and the electrons were described by the Norm conserving pseudopotential[8]. The following valence-electron configurations were considered in the computation: Se-4s<sup>2</sup>4p<sup>4</sup>, Te-5s<sup>2</sup>5p<sup>4</sup>, Hg-5d<sup>10</sup>5p<sup>6</sup>6s<sup>2</sup> and O-2s<sup>2</sup>2p<sup>4</sup>. The numbers of plane waves included in the basis sets were determined by cutoff energy of 750 eV for  $\text{Hg}_2(\text{SeO}_3)(\text{TeO}_3)$ . The numerical integration of the Brillouin zone was performed using Monkhorst-Pack k-point sampling of  $3 \times 2 \times 3$  for  $\text{Hg}_2(\text{SeO}_3)(\text{TeO}_3)$ . The other parameters and convergent criteria were the default values of CASTEP code.

### Calculated method of linear optical response properties

The calculations of linear optical properties in terms of the complex dielectric function  $\varepsilon(\omega) = \varepsilon_1(\omega) + i\varepsilon_2(\omega)$  were made. The imaginary part of the dielectric function  $\varepsilon_2$  was given in the following equation:

$$\varepsilon_{ij_2}(\omega) = \frac{8\pi^2 \hbar^2 e^2}{(m^2 V)} \sum_k \sum_{cv} (f_c - f_v) \frac{p_{cv}^i(k) p_{cv}^j(k)}{E_{vc}^2} \delta[E_c(k) - E_v(k) - \hbar\omega]$$

The  $f_c$  and  $f_v$  represent the fermi distribution functions of the conduction and valence band. The term  $p_{cv}^i(k)$  denotes the momentum matrix element transition from the energy level  $c$  of the conduction band to the level  $v$  of the valence band at the  $k$ th

point in the Brillouin zone (BZ), and  $V$  is the volume of the unit cell.

The real part  $\varepsilon_1(\omega)$  of the dielectric function  $\varepsilon(\omega)$  follows from the Kramer–Kronig relationship. All the other optical constants may be derived from  $\varepsilon_1(\omega)$  and  $\varepsilon_2(\omega)$ . For example, the refractive index  $n(\omega)$  can be calculated using the following expression[7]:

$$n(\omega) = \frac{1}{\sqrt{2}} \left[ \sqrt{\varepsilon_1^2(\omega) + \varepsilon_2^2(\omega)} + \varepsilon_1(\omega) \right]^{1/2}$$

**Table S1.** Summary of crystal data and structural refinements for Hg<sub>2</sub>(SeO<sub>3</sub>)(TeO<sub>3</sub>).

| <b>molecular formula</b>                                                                                                                    | <b>Hg<sub>2</sub>(SeO<sub>3</sub>)(TeO<sub>3</sub>)</b> |
|---------------------------------------------------------------------------------------------------------------------------------------------|---------------------------------------------------------|
| Formula Weight                                                                                                                              | 703.74                                                  |
| crystal system                                                                                                                              | monoclinic                                              |
| space group                                                                                                                                 | <i>P2<sub>1</sub>/c</i>                                 |
| Temperature(K)                                                                                                                              | 286.15                                                  |
| F(000)                                                                                                                                      | 1176.0                                                  |
| a/Å                                                                                                                                         | 7.4108(3)                                               |
| b/Å                                                                                                                                         | 12.2602(6)                                              |
| c/Å                                                                                                                                         | 6.9718(4)                                               |
| α(deg)                                                                                                                                      | 90                                                      |
| β(deg)                                                                                                                                      | 96.634(4)                                               |
| γ(deg)                                                                                                                                      | 90                                                      |
| V/Å <sup>3</sup>                                                                                                                            | 629.20(5)                                               |
| Z                                                                                                                                           | 4                                                       |
| Dc(g.cm <sup>-3</sup> )                                                                                                                     | 7.429                                                   |
| GOF on F <sup>2</sup>                                                                                                                       | 1.037                                                   |
| R <sub>1</sub> , wR <sub>2</sub> [I > 2σ(I)] <sup>a</sup>                                                                                   | R <sub>1</sub> = 0.0290, wR <sub>2</sub> = 0.0695       |
| R <sub>1</sub> , wR <sub>2</sub> (all data) <sup>a</sup>                                                                                    | R <sub>1</sub> = 0.0309, wR <sub>2</sub> = 0.0704       |
| <sup>a</sup> R <sub>1</sub> = $\sum  F_o  -  F_c  /\sum F_o $ , wR <sub>2</sub> = $\{\sum w[(F_o)^2 - (F_c)^2]^2/\sum w[(F_o)^2]^2\}^{1/2}$ |                                                         |

**Table S2.** Calculated bond valences for Hg<sub>2</sub>(SeO<sub>3</sub>)(TeO<sub>3</sub>).

| Compound                                               | Bond         | Bond      | Bond-valence | BVS          |
|--------------------------------------------------------|--------------|-----------|--------------|--------------|
|                                                        |              | lengths   |              |              |
| Hg <sub>2</sub> (SeO <sub>3</sub> )(TeO <sub>3</sub> ) | Se(1)-O(1)   | 1.720(8)  | 1.28         | 3.98         |
|                                                        | Se(1)-O(3)   | 1.711(9)  | 1.31         |              |
|                                                        | Se(1)-O(4)   | 1.690(9)  | 1.39         |              |
|                                                        | Te(1)-O(2)   | 1.846(9)  | 1.42         | 4.15         |
|                                                        | Te(1)-O(5)   | 1.854(9)  | 1.39         |              |
|                                                        | Te(1)-O(6)   | 1.869(9)  | 1.34         |              |
|                                                        | Hg(1)-O(1)   | 2.126(8)  | 0.59         | 1.78         |
|                                                        | Hg(1)-O(3)#1 | 2.480(9)  | 0.23         |              |
|                                                        | Hg(1)-O(4)#2 | 2.451(9)  | 0.24         |              |
|                                                        | Hg(1)-O(4)#3 | 2.627(9)  | 0.15         |              |
|                                                        | Hg(1)-O(6)   | 2.139(9)  | 0.57         |              |
|                                                        | Hg(2)-O(2)#2 | 2.458(10) | 0.24         |              |
|                                                        | Hg(2)-O(2)#4 | 2.154(10) | 0.55         | 1.71<br>1.81 |
|                                                        | Hg(2)-O(3)   | 2.306(9)  | 0.36         |              |
|                                                        | Hg(2)-O(5)   | 2.143(10) | 0.56         |              |
|                                                        | Hg(2)-O(4)   | 2.780     | 0.10         |              |

Green font: Longer Hg-O bonds are considered.

Symmetry transformations used to generate equivalent atoms:

#1 +X,3/2-Y,1/2+Z; #2 +X,3/2-Y,-1/2+Z; #3 1-X,-1/2+Y,3/2-Z; #4 -X,1/2+Y,3/2-Z



**Table S3.** State energies (eV) of the lowest conduction band (L-CB) and the highest valence band (H-VB) of Hg<sub>2</sub>(SeO<sub>3</sub>)(TeO<sub>3</sub>).

| <b>k-point</b>           | <b>L-CB</b> | <b>H-VB</b> |
|--------------------------|-------------|-------------|
| Z (0.000, 0.000, 0.500)  | 2.968588    | -0.01797    |
| G (0.000, 0.000, 0.000)  | 2.774069    | -0.11617    |
| Y (0.000, 0.500, 0.000)  | 2.857683    | -0.18739    |
| A (-0.500, 0.500, 0.000) | 2.789223    | -0.1695     |
| B (-0.500, 0.000, 0.000) | 2.467077    | -0.09258    |
| D (-0.500, 0.000, 0.500) | 2.835134    | -0.10066    |
| E (-0.500, 0.500, 0.500) | 2.908111    | -0.17195    |
| C (0.000, 0.500, 0.500)  | 3.059388    | -0.08067    |

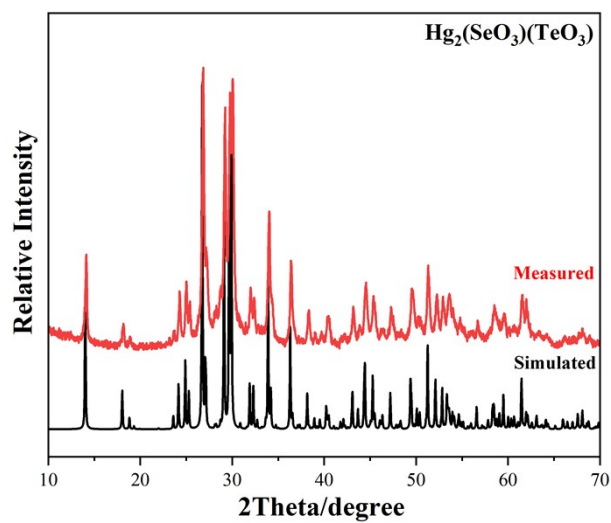

**Figure S1.** Simulated and experimental powder X-ray diffractometer patterns of  $\text{Hg}_2(\text{SeO}_3)(\text{TeO}_3)$ .

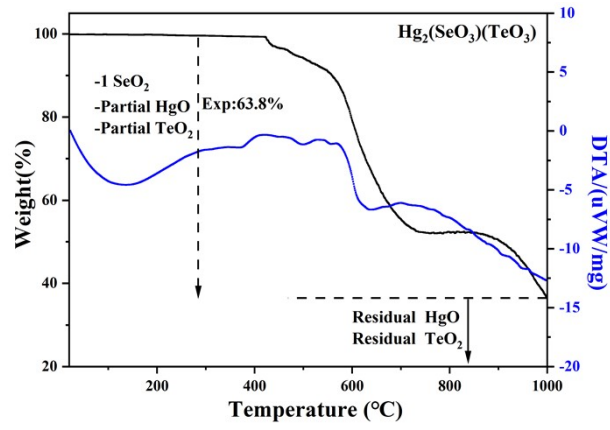

**Figure S2.** TGA and DTA results of  $\text{Hg}_2(\text{SeO}_3)(\text{TeO}_3)$ .

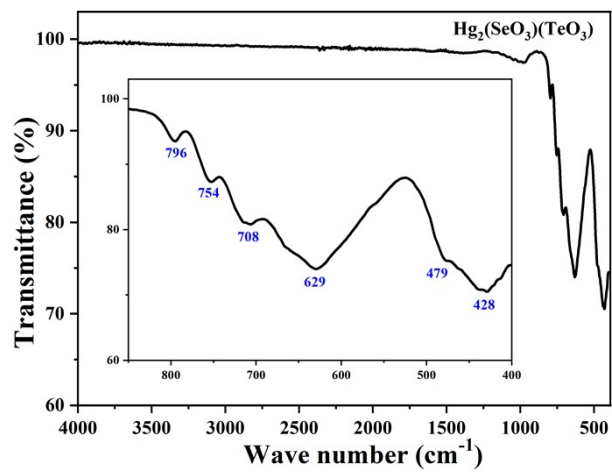

**Figure S3.** IR spectra of  $\text{Hg}_2(\text{SeO}_3)(\text{TeO}_3)$ .

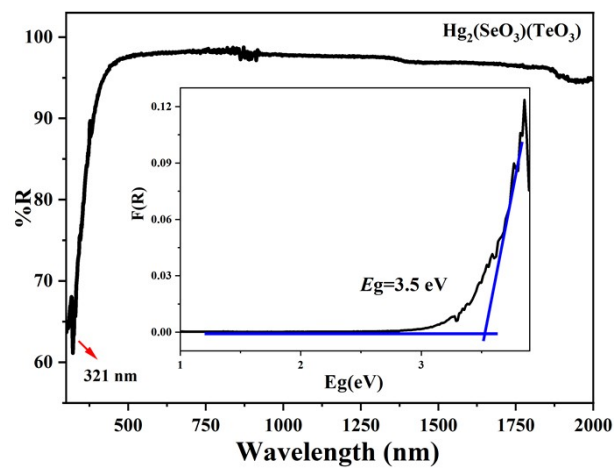

**Figure S4.** UV–vis–NIR diffuse-reflectance spectra of  $\text{Hg}_2(\text{SeO}_3)(\text{TeO}_3)$ .

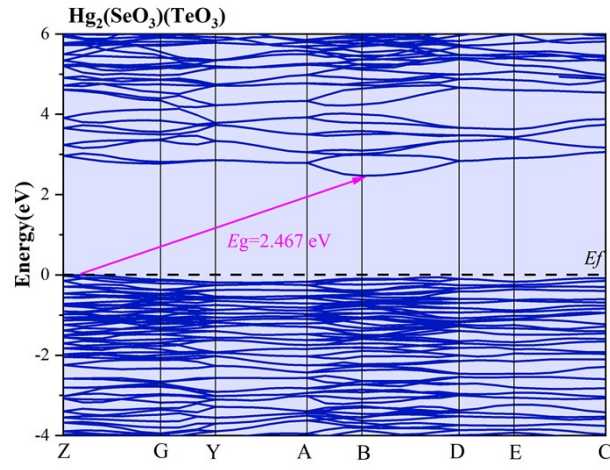

**Figure S5.** Band structures of  $\text{Hg}_2(\text{SeO}_3)(\text{TeO}_3)$ .

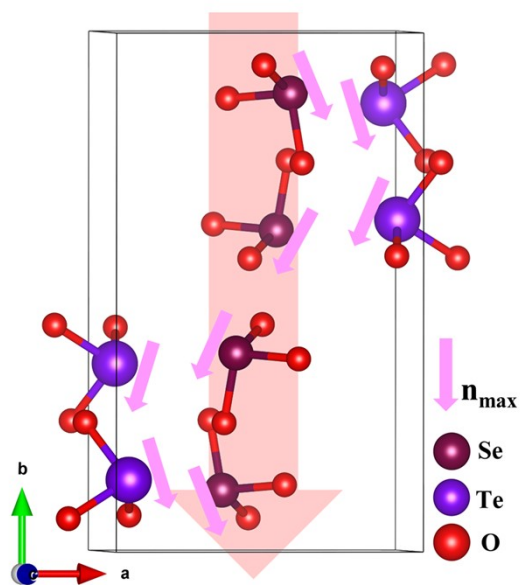

**Figure S6.** Arrangement of SeO<sub>3</sub> and TeO<sub>3</sub> groups in the structure of Hg<sub>2</sub>(SeO<sub>3</sub>)(TeO<sub>3</sub>).

## References

- [1] P. Kubelka, F. Munk, An Article on Optics of Paint Layers, *Technol. Physical* 12 (1931) 259–274.
- [2] G.M. Sheldrick, Crystal structure refinement with SHELXL, *Acta Cryst.*, C71 (2015) 3-8.
- [3] O.V. Dolomanov, L.J. Bourhis, R.J. Gildea, J.A.K. Howard, H. Puschmann, OLEX2: a complete structure solution, refinement and analysis program, *J. Appl. Cryst.*, 42 (2009) 339-341.
- [4] R.H. Blessing, An empirical correction for absorption anisotropy, *Acta Cryst.*, A51 (1995) 33–38.
- [5] A.L. Spek, Single-crystal structure validation with the program PLATON, *J. Appl. Cryst.*, 36 (2003) 7–13.
- [6] M.D. Segall, P.J.D. Lindan, M.J. Probert, C.J. Pickard, P.J. Hasnip, S.J. Clark, M.C. Payne, First-principles simulation: ideas, illustrations and the CASTEP code, *Phys-Condens Mat.*, 14 (2002) 2717-2744.
- [7] V. Milman, B. Winkler, J.A. White, C.J. Pickard, M.C. Payne, E.V. Akhmatkaya, R.H. Nobes, Electronic structure, properties, and phase stability of inorganic crystals: A pseudopotential plane-wave study, *Int. J. Quantum. Chem.*, 77 (2000) 895-910.
- [8] J.P. Perdew, K. Burke, M. Ernzerhof, Generalized Gradient Approximation Made Simple, *Phys. Rev. Lett.*, 77 (1996) 3865-3868.
